# Supplementary material for: Investigation of interfacial thermal transport across graphene and an organic semiconductor using molecular dynamics simulations
Source: Royal Society of Chemistry journal article supplement (doi:10.1039/c7cp01958k), 2017-01-01
Supplement: c7cp01958k1.pdf [file c7cp01958k1.pdf]

Supplementary Information for

## Investigation of interfacial thermal transport across graphene and an organic semiconductor using molecular dynamics simulations

Xinyu Wang,<sup>a</sup> Jingchao Zhang,<sup>b</sup> Yue Chen<sup>\*a</sup> and Paddy K. L. Chan<sup>\*a</sup>

<sup>a</sup> Department of Mechanical Engineering, The University of Hong Kong, Hong Kong

<sup>b</sup> Holland Computing Center, University of Nebraska-Lincoln, Lincoln, NE 68588, USA

### 1. Potential parameters in the simulation

The general AMBER force field (GAFF)<sup>1</sup> is employed to describe the intermolecular and intramolecular interactions of DNTT molecules. In GAFF, the total energy of the system,  $E_{pair}$ , includes five components: the bond, angle, dihedral, van der Waals interaction (Lennard-Jones potential, L-J potential) and electrostatic terms, as presented below:

$$E_{pair} = \sum_{bonds} k_r (r_b - r_{b,eq})^2 + \sum_{angles} k_\theta (\theta - \theta_{eq})^2 + \sum_{dihedrals} \frac{v_n}{2} \times [1 + \cos(n\varphi - \gamma)] \\ + \sum_{i < j} 4\epsilon \left[ \left( \frac{\sigma}{r_{ij}} \right)^{12} - \left( \frac{\sigma}{r_{ij}} \right)^6 \right] + \sum_{i < j} C \frac{q_i q_j}{r_{ij}} \quad (S1)$$

where,  $r_b$  and  $\theta$  are the bond length and angle, respectively; subscript “eq” represents the equilibrium condition;  $k_r$ ,  $k_\theta$  and  $v_n$  are force constants;  $n$  is multiplicity and  $\gamma$  is phase angle for dihedral angle parameters;  $r$  is the distance between atoms;  $\epsilon$  is the depth of potential well;  $\sigma$  is the zero energy separation distance;  $C$  is an energy-conversion constant;  $q$  is the charge; subscripts “i” and “j” represent atoms. The cutoff distances for L-J potential and electrostatic terms are 10 Å. The detailed GAFF parameters used in the simulation are shown in Tables S1-S7.

The second-generation reactive empirical bond order (REBO) potential is applied to describe the C-C interaction in graphene.<sup>2</sup> The L-J potential is also employed to describe the van der Waals interaction of graphene and DNTT as below:

---

\* Corresponding authors. E-mail: [pklc@hku.hk](mailto:pklc@hku.hk) (Paddy K. L. Chan) and [yuechen@hku.hk](mailto:yuechen@hku.hk) (Yue Chen).

$$E_{LJ} = 4\chi\epsilon \left[ \left( \frac{\sigma}{r} \right)^{12} - \left( \frac{\sigma}{r} \right)^6 \right] \quad (\text{S2})$$

where,  $\chi$  is the coupling strength factor to tune the interaction strength between graphene and DNNT. The cutoff distances for the van der Waals interaction of graphene and DNNT are 10 Å. The L-J potential parameters for interaction of graphene and DNNT are calculated from the universal force field (UFF)<sup>3</sup> as shown in Table S8.

Table S1 List of atom types

| Atom     | Type | Description                                                                                      |
|----------|------|--------------------------------------------------------------------------------------------------|
| Carbon   | CA   | Aromatic carbon in DNNT molecule                                                                 |
|          | CB   | Aromatic carbon at junction of 5- and 6-membered rings and attached to sulfur in DNNT molecule   |
|          | CC   | Aromatic carbon at junction of 5- and 6-membered rings and unattached to sulfur in DNNT molecule |
|          | CS   | Carbon at junction of two 5-membered rings in DNNT molecule                                      |
| Hydrogen | CG   | Graphene carbon                                                                                  |
|          | HA   | H attached to aromatic carbon in DNNT molecule                                                   |
| Sulfur   | HG   | H attached to graphene carbon                                                                    |
|          | S    | Sulfur in 5-membered ring in DNNT molecule                                                       |

Table S2 List of bond parameters of GAFF

| Bond  | $k_r$ (eV/Å <sup>2</sup> ) | $r_{b,eq}$ (Å) |
|-------|----------------------------|----------------|
| CA-CA | 20.028748                  | 1.3980         |
| CA-CB | 21.300848                  | 1.3790         |
| CA-CC | 21.830059                  | 1.3715         |
| CA-HA | 15.371818                  | 1.0800         |
| CB-CC | 18.032574                  | 1.4310         |
| CB-S  | 12.190098                  | 1.7345         |
| CS-CC | 18.032574                  | 1.4310         |
| CS-CS | 22.748275                  | 1.3590         |
| CS-S  | 12.190098                  | 1.7345         |

Table S3 List of angle parameters of GAFF

| Angle    | $k_\theta$ (eV/rad <sup>2</sup> ) | $\theta_{eq}$ (°) |
|----------|-----------------------------------|-------------------|
| CA-CA-CA | 2.873818                          | 120.3300          |
| CA-CA-CB | 2.926188                          | 119.6500          |
| CA-CA-CC | 2.875878                          | 120.8500          |
| CA-CA-HA | 2.102674                          | 119.6600          |
| CB-CA-HA | 2.107006                          | 120.2000          |
| CC-CA-HA | 2.137473                          | 119.6000          |
| CA-CB-CC | 2.825984                          | 121.0000          |
| CA-CB-S  | 2.477234                          | 126.1000          |
| CC-CB-S  | 2.259073                          | 132.2500          |
| CA-CC-CB | 2.909368                          | 119.4000          |
| CA-CC-CS | 2.909368                          | 119.4000          |
| CB-CC-CS | 3.405900                          | 109.2500          |
| CC-CS-CS | 3.204438                          | 114.0000          |
| CC-CS-S  | 2.259073                          | 132.2500          |
| CS-CS-S  | 3.061716                          | 113.6000          |
| CB-S-CS  | 4.449848                          | 90.2800           |

Table S4 List of dihedral angle parameters of GAFF

| Dihedral angle | $\frac{v_n}{2}$ (eV) | $n$ | $\gamma$ (°) |
|----------------|----------------------|-----|--------------|
| X-CA-CA-X      | 0.157192             | 2   | 180          |
| X-CA-CB-X      | 0.151772             | 2   | 180          |
| X-CA-CC-X      | 0.151772             | 2   | 180          |
| X-CB-CC-X      | 0.236331             | 2   | 180          |
| X-CB-S-X       | 0.014453             | 3   | 0            |
| X-CC-CS-X      | 0.072634             | 2   | 180          |
| X-CS-CS-X      | 0.288367             | 2   | 180          |
| X-CS-S-X       | 0.014453             | 3   | 0            |

Table S5 List of improper dihedral angle parameters of GAFF

| Improper dihedral angle | $\frac{v_n}{2}$ (eV) | $n$ | $\gamma$ (°) |
|-------------------------|----------------------|-----|--------------|
| X-X-X-X                 | 0.047700             | 2   | 180          |

Table S6 List of Lennard-Jones potential parameters of GAFF

| Atom type | $\epsilon$ (eV) | $\sigma$ (Å) |
|-----------|-----------------|--------------|
| CA        | 0.003729        | 3.4000       |
| CB        | 0.003729        | 3.4000       |
| CC        | 0.003729        | 3.4000       |
| CS        | 0.003729        | 3.4000       |
| HA        | 0.000650        | 2.6000       |
| S         | 0.010841        | 3.5640       |

Table S7 List of charge parameters of atoms in DNTT

| Atom type            | $q$     |
|----------------------|---------|
| CA (attached to H)   | -0.1270 |
| CA (unattached to H) | 0.0000  |
| CB                   | -0.0130 |
| CC                   | 0.0000  |
| CS                   | -0.0130 |
| HA                   | 0.1270  |
| S                    | 0.0260  |

Table S8 List of Lennard-Jones potential parameters of UFF

| Pair type | $\epsilon$ (eV) | $\sigma$ (Å) |
|-----------|-----------------|--------------|
| CG-CA     | 0.004553        | 3.4309       |
| CG-CB     | 0.004553        | 3.4309       |
| CG-CC     | 0.004553        | 3.4309       |
| CG-CS     | 0.004553        | 3.4309       |
| CG-HA     | 0.002947        | 2.9700       |
| CG-S      | 0.007355        | 3.5119       |
| HG-CA     | 0.002947        | 2.9700       |
| HG-CB     | 0.002947        | 2.9700       |
| HG-CC     | 0.002947        | 2.9700       |
| HG-CS     | 0.002947        | 2.9700       |
| HG-HA     | 0.001908        | 2.5711       |
| HG-S      | 0.004761        | 3.0402       |

## 2. Effect of DNTT orientation on TBR of graphene and DNTT

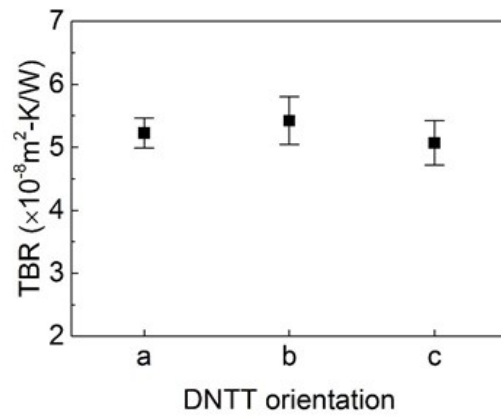

Fig. S1 TBR variation of graphene and DNTT at different DNTT orientations (*a*, *b* and *c* directions). There is no dependence of TBR on DNTT orientation.

### 3. Verification of TBR of graphene and DNTT without graphene lattice constant modification

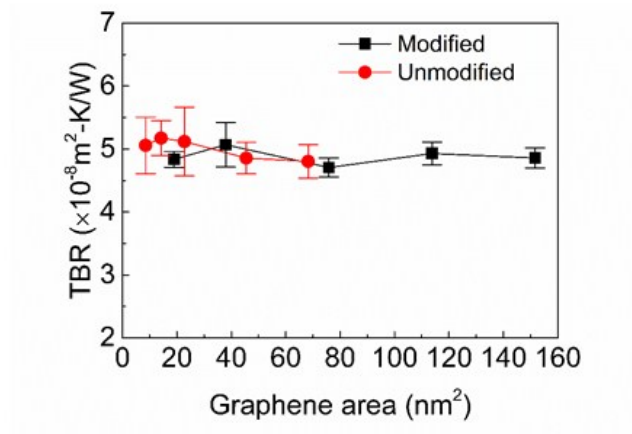

Fig. S2 TBR variation of graphene and DNTT at different graphene areas. The black square symbols represent the TBR with graphene lattice constant modification and the periodic boundary conditions are applied in in-plane direction during the simulation. The red dot symbols represent the TBR without graphene lattice constant modification and the free boundary conditions are applied in in-plane direction during the simulation.

#### 4. Contributions of “C” and “H” of hydrogenated graphene to the TBR of hydrogenated graphene and DNTT

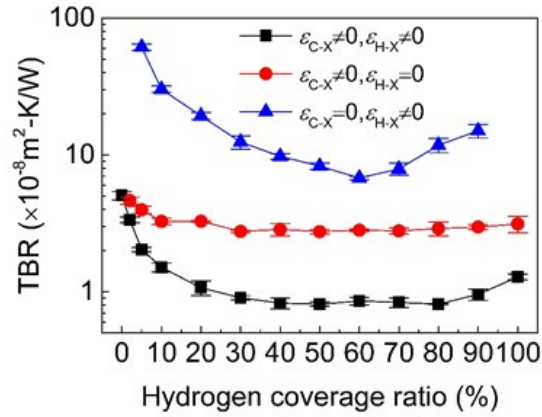

Fig. S3 Contributions of “C” and “H” of hydrogenated graphene to the TBR of hydrogenated graphene and DNTT. “C”, “H” and “X” represent the carbon atoms of hydrogenated graphene, hydrogen atoms of hydrogenated graphene and atoms (carbon, hydrogen, or sulfur) of DNTT, respectively. “ $\varepsilon_{C-X} \neq 0$ ” and “ $\varepsilon_{H-X} \neq 0$ ” (black square symbols) represent both “C” and “H” in hydrogenated graphene participate in the interfacial thermal transport with DNTT; “ $\varepsilon_{C-X} \neq 0$ ” and “ $\varepsilon_{H-X} = 0$ ” (red dot symbols) represent only “C” in hydrogenated graphene participates in the interfacial thermal transport with DNTT and the interaction between “H” of hydrogenated graphene and DNTT is turned off; “ $\varepsilon_{C-X} = 0$ ” and “ $\varepsilon_{H-X} \neq 0$ ” (blue triangle symbols) represent only “H” in hydrogenated graphene participates in the interfacial thermal transport with DNTT and the interaction between “C” of hydrogenated graphene and DNTT is turned off. It can be observed that the contribution from “C” of hydrogenated graphene to interfacial thermal transport is much larger than that from “H” of hydrogenated graphene.

## 5. Phonon DOS of graphene and DNTT with DNTT vacancies

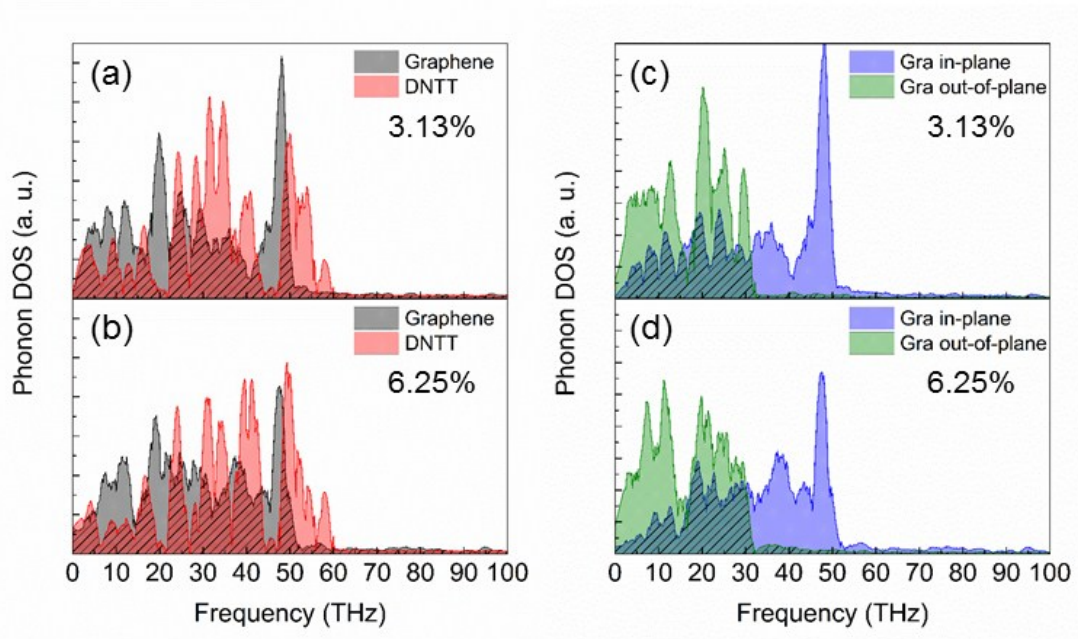

Fig. S4 (a)-(b) Phonon DOS of total graphene and DNTT at DNTT vacancy concentration of 3.13% and 6.25%. (c)-(d) Phonon DOS of in-plane and out-of-plane graphene at DNTT vacancy concentration of 3.13% and 6.25%. Slanted line areas denote overlap of phonon DOS. The phonon overlapping factors of graphene and DNTT are 0.597 and 0.604 at DNTT vacancy concentration of 3.13% and 6.25%; and the phonon overlapping factors of in-plane and out-of-plane phonons in graphene are 0.451 and 0.455 at DNTT vacancy concentration of 3.13% and 6.25%.



## References

1. J. Wang, R. M. Wolf, J. W. Caldwell, P. A. Kollman and D. A. Case, *J. Comput. Chem.*, 2004, **25**, 1157-1174.
2. W. B. Donald, A. S. Olga, A. H. Judith, J. S. Steven, N. Boris and B. S. Susan, *J. Phys. Condens. Matter*, 2002, **14**, 783.
3. A. K. Rappe, C. J. Casewit, K. S. Colwell, W. A. Goddard and W. M. Skiff, *J. Am. Chem. Soc.*, 1992, **114**, 10024-10035.
